# Supplementary material for: Effect of Frequency and Ratio of Wet/Dry Stages in Cyclic Corrosion Tests on Localized Corrosion of Complex-Phase High-Strength Steel
Source: MDPI journal article supplement (doi:10.3390/ma16237329), 2023-11-24
Supplement: s1 [file s1]

# Effect of Frequency and Ratio of Wet/Dry Stages in Cyclic Corrosion Tests on Localized Corrosion of Complex-Phase High-Strength Steel

Jin-Seok Yoo, Geon-Il Kim and Jung-Gu Kim \*

Department of Materials Science and Engineering, Sungkyunkwan University, 2066, Seobu-Ro, Jangan-Gu, Suwon-Si 16419, Republic of Korea; wlstjr5619@skku.edu (J.-S.Y.); geonil1027@skku.edu (G.-I.K.)

\* Correspondence: kimjg@skku.edu

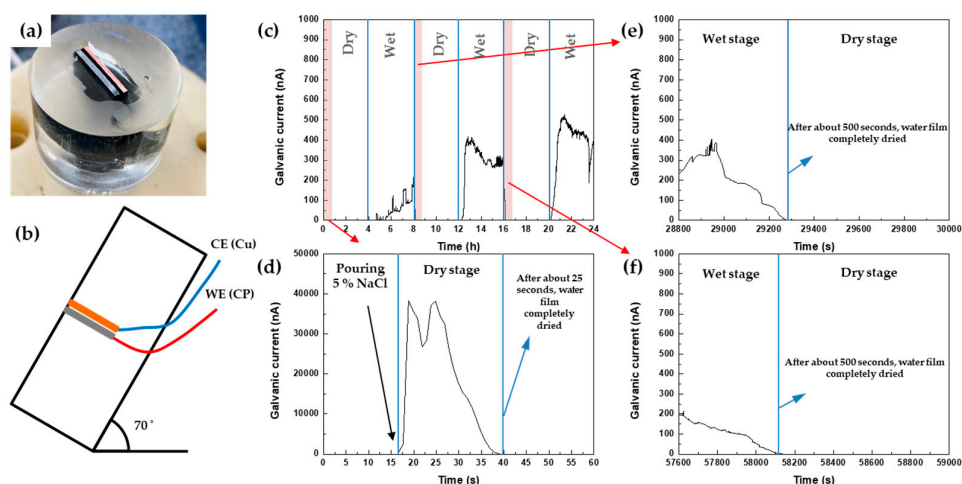

**Figure S1.** Cell information to check the evaporation time of the water film in the dry stage (a) photograph of the specimen, (b) schematic of the cell in the CCT chamber, (c) galvanic current during the 1 Cycle of CCT, (d) galvanic current during the first dry stage (salt spray to dry), (e) galvanic current during the second dry stage (dry to wet), (f) galvanic current during the third dry stage.

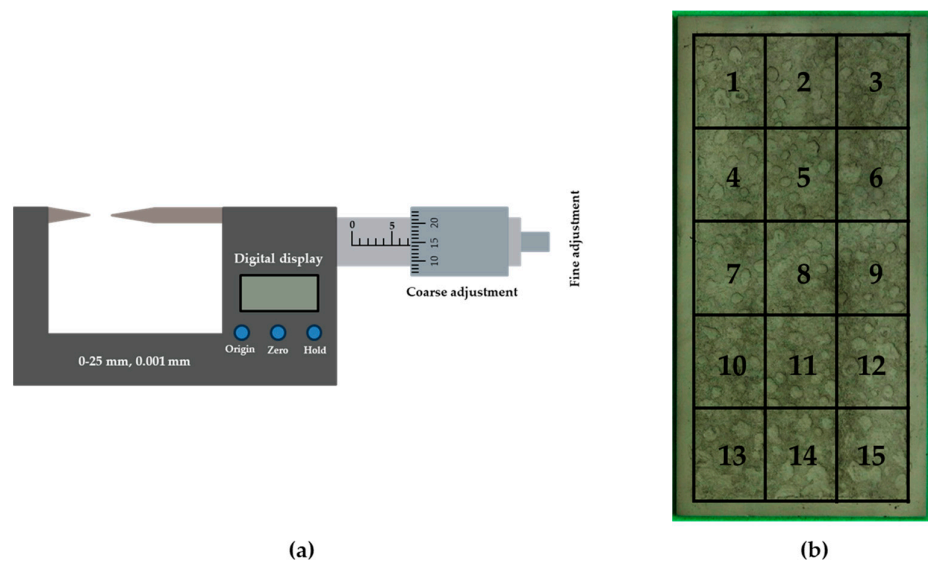

**Figure S2.** (a) Schematic of the digital point micrometer (IP65 342-252-30, Mitutoyo, Kawasaki, Japan), (b) divided regions to calculate the maximum corrosion depth.

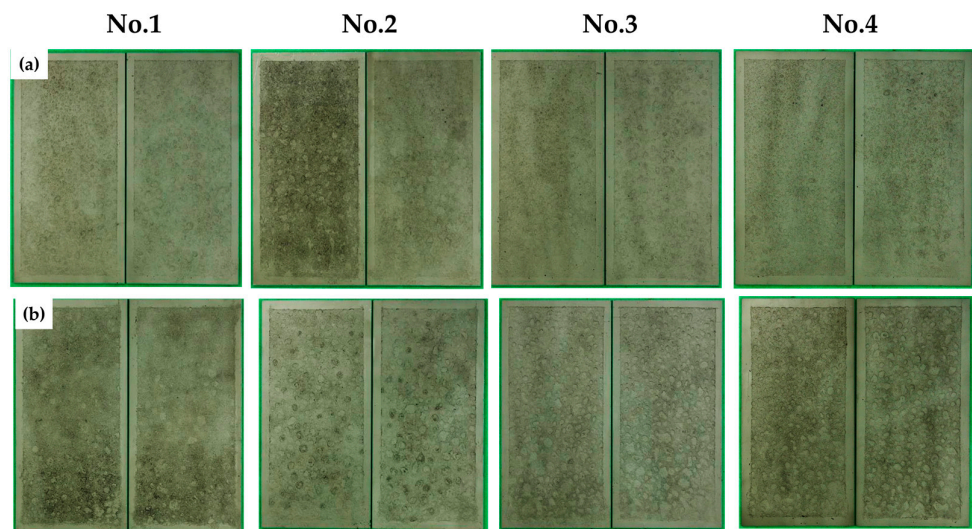

**Figure S3.** Results of CCT for four different conditions after acid cleaning (a) 15 cycles, (b) 30 cycles.

**Table S1.** Raw data of mass loss after CCT.

| CCT condition                   | No. 1     |        |           |        | No. 2     |        |           |        | No. 3     |        |           |        | No. 4     |        |           |        |
|---------------------------------|-----------|--------|-----------|--------|-----------|--------|-----------|--------|-----------|--------|-----------|--------|-----------|--------|-----------|--------|
| CCT cycle                       | 15 cycles |        | 30 cycles |        |
| Initial mass (g)                | 106.20    | 105.19 | 105.37    | 104.97 | 104.07    | 106.41 | 105.48    | 106.12 | 106.17    | 106.23 | 103.88    | 106.25 | 105.68    | 104.46 | 106.00    | 105.66 |
| Final Mass (g)                  | 100.77    | 99.21  | 95.05     | 94.44  | 97.93     | 100.40 | 94.53     | 95.10  | 99.75     | 99.10  | 92.19     | 94.40  | 97.78     | 98.64  | 92.08     | 92.33  |
| Mass loss (mg/cm <sup>2</sup> ) | 62.45     | 68.26  | 113.34    | 115.76 | 67.42     | 66.08  | 120.31    | 121.10 | 70.55     | 78.39  | 128.47    | 130.15 | 86.91     | 64.04  | 152.93    | 146.44 |
| Ave.                            | 65.36     |        | 114.55    |        | 66.75     |        | 120.71    |        | 74.47     |        | 129.31    |        | 75.48     |        | 149.69    |        |
| Std.                            | 4.10      |        | 1.72      |        | 0.94      |        | 0.56      |        | 5.54      |        | 1.19      |        | 16.17     |        | 4.59      |        |

**Table S2.** Raw data of corrosion depth after CCT ( $\mu\text{m}$ ).

| CCT condition |  | No. 1     |     |           |     | No. 2     |     |           |     | No. 3     |     |           |     | No. 4     |     |           |     |
|---------------|--|-----------|-----|-----------|-----|-----------|-----|-----------|-----|-----------|-----|-----------|-----|-----------|-----|-----------|-----|
| CCT cycle     |  | 15 cycles |     | 30 cycles |     | 15 cycles |     | 30 cycles |     | 15 cycles |     | 30 cycles |     | 15 cycles |     | 30 cycles |     |
| 1             |  | 187       | 161 | 318       | 258 | 200       | 184 | 436       | 468 | 255       | 279 | 567       | 477 | 272       | 256 | 545       | 545 |
| 2             |  | 162       | 177 | 289       | 258 | 236       | 211 | 430       | 433 | 272       | 228 | 523       | 470 | 282       | 278 | 499       | 544 |
| 3             |  | 161       | 165 | 243       | 282 | 176       | 189 | 403       | 471 | 214       | 279 | 457       | 515 | 264       | 256 | 479       | 616 |
| 4             |  | 171       | 169 | 204       | 282 | 203       | 205 | 394       | 381 | 254       | 249 | 467       | 489 | 248       | 254 | 491       | 490 |
| 5             |  | 147       | 174 | 253       | 234 | 216       | 190 | 392       | 380 | 268       | 234 | 416       | 400 | 254       | 227 | 506       | 465 |
| 6             |  | 172       | 148 | 375       | 229 | 242       | 199 | 409       | 436 | 228       | 233 | 538       | 454 | 248       | 228 | 512       | 532 |
| 7             |  | 174       | 183 | 386       | 286 | 216       | 200 | 368       | 412 | 221       | 234 | 469       | 439 | 244       | 270 | 499       | 572 |
| 8             |  | 178       | 150 | 311       | 206 | 203       | 211 | 404       | 441 | 211       | 226 | 416       | 448 | 271       | 253 | 529       | 453 |
| 9             |  | 169       | 148 | 313       | 278 | 210       | 182 | 407       | 413 | 244       | 229 | 507       | 496 | 282       | 253 | 501       | 541 |
| 10            |  | 149       | 146 | 298       | 330 | 185       | 196 | 422       | 402 | 225       | 225 | 492       | 408 | 304       | 316 | 492       | 485 |
| 11            |  | 154       | 136 | 293       | 366 | 214       | 200 | 424       | 408 | 232       | 280 | 422       | 419 | 268       | 267 | 451       | 467 |
| 12            |  | 172       | 154 | 303       | 338 | 223       | 164 | 405       | 443 | 202       | 231 | 479       | 492 | 271       | 257 | 413       | 489 |
| 13            |  | 114       | 095 | 295       | 302 | 202       | 156 | 410       | 397 | 176       | 199 | 437       | 342 | 289       | 246 | 410       | 411 |
| 14            |  | 141       | 139 | 361       | 258 | 191       | 149 | 341       | 433 | 203       | 219 | 420       | 352 | 287       | 224 | 413       | 443 |
| 15            |  | 128       | 102 | 296       | 247 | 198       | 167 | 330       | 416 | 192       | 214 | 417       | 387 | 309       | 244 | 413       | 411 |
| Ave.          |  | 159       | 150 | 302       | 277 | 208       | 187 | 398       | 422 | 226       | 237 | 468       | 439 | 273       | 255 | 477       | 497 |
| Std.          |  | 019       | 024 | 048       | 043 | 018       | 020 | 030       | 028 | 028       | 024 | 049       | 053 | 019       | 022 | 045       | 059 |
| Max.          |  | 187       | 183 | 386       | 366 | 242       | 211 | 436       | 471 | 272       | 280 | 567       | 515 | 309       | 316 | 545       | 616 |
